# Supplementary material for: Formylation as a Chemical Tool to Modulate the Performance of Photosensitizers Based on Boron Dipyrromethene Dimers
Source: MDPI journal article supplement (doi:10.3390/ijms241411837), 2023-07-23
Supplement: s1 [file s1]

## Supplementary Materials

# Formylation as a Chemical Tool to Modulate the Performance of Photosensitizers Based on Boron Dipyrromethene Dimers

Carolina Díaz-Norambuena <sup>1,2</sup>, Edurne Avellanal-Zaballa <sup>1</sup>, Alejandro Prieto-Castañeda <sup>1,2</sup>, Jorge Bañuelos <sup>1,\*</sup>, Santiago de la Moya <sup>2</sup>, Antonia R. Agarrabeitia <sup>2,3</sup> and María J. Ortiz <sup>2,\*</sup>

<sup>1</sup> Departamento de Química Física, Facultad de Ciencia y Tecnología, Universidad del País Vasco-EHU,

Apartado 644, 48080 Bilbao, Spain; carolina.diaz@ehu.eus (C.D.-N.);

edurne.avellanal@ehu.eus (E.A.-Z.);

alejandro.prietoc@ehu.eus (A.P.-C.)

<sup>2</sup> Departamento Química Orgánica, Facultad de Ciencias Químicas, Universidad Complutense de Madrid, Ciudad Universitaria s/n, 28040 Madrid, Spain;

santmoya@ucm.es (S.d.l.M.);

agarrabe@quim.ucm.es (A.R.A.)

<sup>3</sup> Sección Departamental de Química Orgánica, Facultad de Óptica y Optometría, Universidad Complutense de Madrid, Arcos de Jalón 118, 28037 Madrid, Spain

\* Correspondence: jorge.banuelos@ehu.es (J.B.); mjortiz@quim.ucm.es (M.J.O.)

|                                                                                                         |     |
|---------------------------------------------------------------------------------------------------------|-----|
| <b>Table S1.</b> Photophysical data .....                                                               | S2  |
| <b>Figure S1.</b> Absorption and fluorescence spectra of dimers 2-8' .....                              | S3  |
| <b>Figure S2.</b> S <sub>0</sub> optimized geometries and frontier MOs of dimers 2-8' .....             | S4  |
| <b>Figure S3.</b> Absorption and fluorescence spectra of dimers 3-8' .....                              | S5  |
| <b>Figure S4.</b> S <sub>0</sub> optimized geometries and frontier MOs of dimers 3-8' .....             | S6  |
| <b>Figure S5.</b> Absorption and fluorescence spectra of unconstrained dimers 2-8' .....                | S7  |
| <b>Figure S6.</b> S <sub>0</sub> optimized geometries and frontier MOs of unconstrained dimers 2-8' ... | S8  |
| <b>Figure S7.</b> Ns-transient absorption spectra .....                                                 | S9  |
| <b>Figure S8.</b> T <sub>1</sub> optimized geometries and spin densities.....                           | S10 |

**Table S1.** Photophysical properties of the BODIPY-based 2-8' and 3-8' dimers and their formulated derivatives in diluted solutions (2  $\mu$ M) of different solvents.

|           |                   | $\lambda_{ab}$<br>(nm) | $\epsilon_{max}$<br>( $10^4 \text{ M}^{-1}\text{cm}^{-1}$ ) | $\lambda_{fl}$<br>(nm) | $\phi$ | $\tau$<br>(ns)                                     | $\phi^A$ |
|-----------|-------------------|------------------------|-------------------------------------------------------------|------------------------|--------|----------------------------------------------------|----------|
| <b>1</b>  | Toluene           | 511.0                  | 17.3                                                        | 525.0                  | 0.46   | 1.56(5%) - 5.87(95%)                               | 0.41     |
|           | CHCl <sub>3</sub> | 511.0                  | 16.5                                                        | 525.0                  | 0.19   | 0.02(78%) - 5.02(22%)                              | 0.84     |
|           | ACN               | 505.0                  | 15.4                                                        | 512.5                  | 0.03   | 0.63(10%) - 4.67(90%)                              | 0.65     |
| <b>1a</b> | Toluene           | 511.5                  | 6.7                                                         | 545.5<br>605.0         | 0.030  | 1.88(40%) - 4.30(60%)<br>1.88(93%) - 4.79(7%)      | 0.93     |
|           | CHCl <sub>3</sub> | 509.0                  | 6.2                                                         | 521.5                  | 0.011  | 1.54(21%) - 4.21(79%)                              | 0.50     |
|           | ACN               | 504.5                  | 5.5                                                         | 513.0                  | 0.005  | -                                                  | 0        |
| <b>1b</b> | Toluene           | 509.0                  | 14.7                                                        | 534.0                  | 0.175  | 0.89(9%) - 3.32(91%)                               | 0.71     |
|           | CHCl <sub>3</sub> | 505.5                  | 13.9                                                        | 529.5<br>625.0         | 0.022  | 0.02(94%) - 1.65(6%)<br>1.23(38%) - 1.91(62%)      | 0.75     |
|           | ACN               | 501.5                  | 12.9                                                        | 517.0                  | 0.002  | -                                                  | 0        |
| <b>2</b>  | Toluene           | 509.0                  | 7.3                                                         | 529.0<br>596.0         | 0.021  | 1.27(17%) - 4.49(83%)<br>1.51(25%) - 4.01(75%)     | 0.84     |
|           | CHCl <sub>3</sub> | 507.0                  | 6.7                                                         | 522.5                  | 0.011  | 1.59(25%) - 4.84(75%)                              | 0.64     |
|           | ACN               | 506.0                  | 6.5                                                         | 518.0                  | 0.004  | -                                                  | 0        |
| <b>2a</b> | Toluene           | 504.5                  | 7.2                                                         | 589.5                  | 0.24   | 4.19                                               | 0.61     |
|           | CHCl <sub>3</sub> | 499.5                  | 5.4                                                         | 519.0<br>638.0         | 0.020  | 1.85(21%) - 4.87(79%)<br>1.18(92%) - 2.62(8%)      | 0.62     |
|           | ACN               | 496.5                  | 5.4                                                         | 527.5                  | 0.005  | -                                                  | 0        |
| <b>2b</b> | Toluene           | 510.0                  | 8.9                                                         | 586.5                  | 0.268  | 2.06(18%) - 5.49(82%)                              | 0.40     |
|           | CHCl <sub>3</sub> | 507.0                  | 8.7                                                         | 587.0                  | 0.161  | 2.59(32%) - 4.43(68%)                              | 0.50     |
|           | ACN               | 502.5                  | 8.0                                                         | 517.5                  | 0.003  | -                                                  | 0.23     |
| <b>3</b>  | Toluene           | 509.5                  | 8.8                                                         | 518.5<br>580.0         | 0.144  | 2.89 (44%) - 5.49 (56%)<br>1.02 (10%) - 2.50 (90%) | 0.80     |
|           | CHCl <sub>3</sub> | 507.0                  | 7.9                                                         | 513.5<br>676.0         | 0.028  | 2.59 (15%) - 4.36 (85%)<br>1.43                    | 0.55     |
|           | ACN               | 502.5                  | 7.9                                                         | 508.0                  | 0.004  | -                                                  | 0        |
| <b>3a</b> | Toluene           | 521.5                  | 5.1                                                         | 558.5                  | 0.348  | 1.91 (11%) - 5.97 (89%)                            | 0.31     |
|           | CHCl <sub>3</sub> | 518.0                  | 4.8                                                         | 559.5                  | 0.189  | 0.50 (14%) - 4.06 (86%)                            | 0.22     |
|           | ACN               | 508.0                  | 4.6                                                         | 508.5                  | 0.004  | -                                                  | 0.17     |

Absorption ( $\lambda_{ab}$ ) and fluorescence ( $\lambda_{fl}$ ) wavelength, molar absorption at the maximum ( $\epsilon_{max}$ ), fluorescence quantum yield ( $\phi$ ) and lifetime ( $\tau$ ), and singlet oxygen generation quantum yield ( $\phi^A$ ).

CHCl<sub>3</sub>: chloroform; ACN: acetonitrile

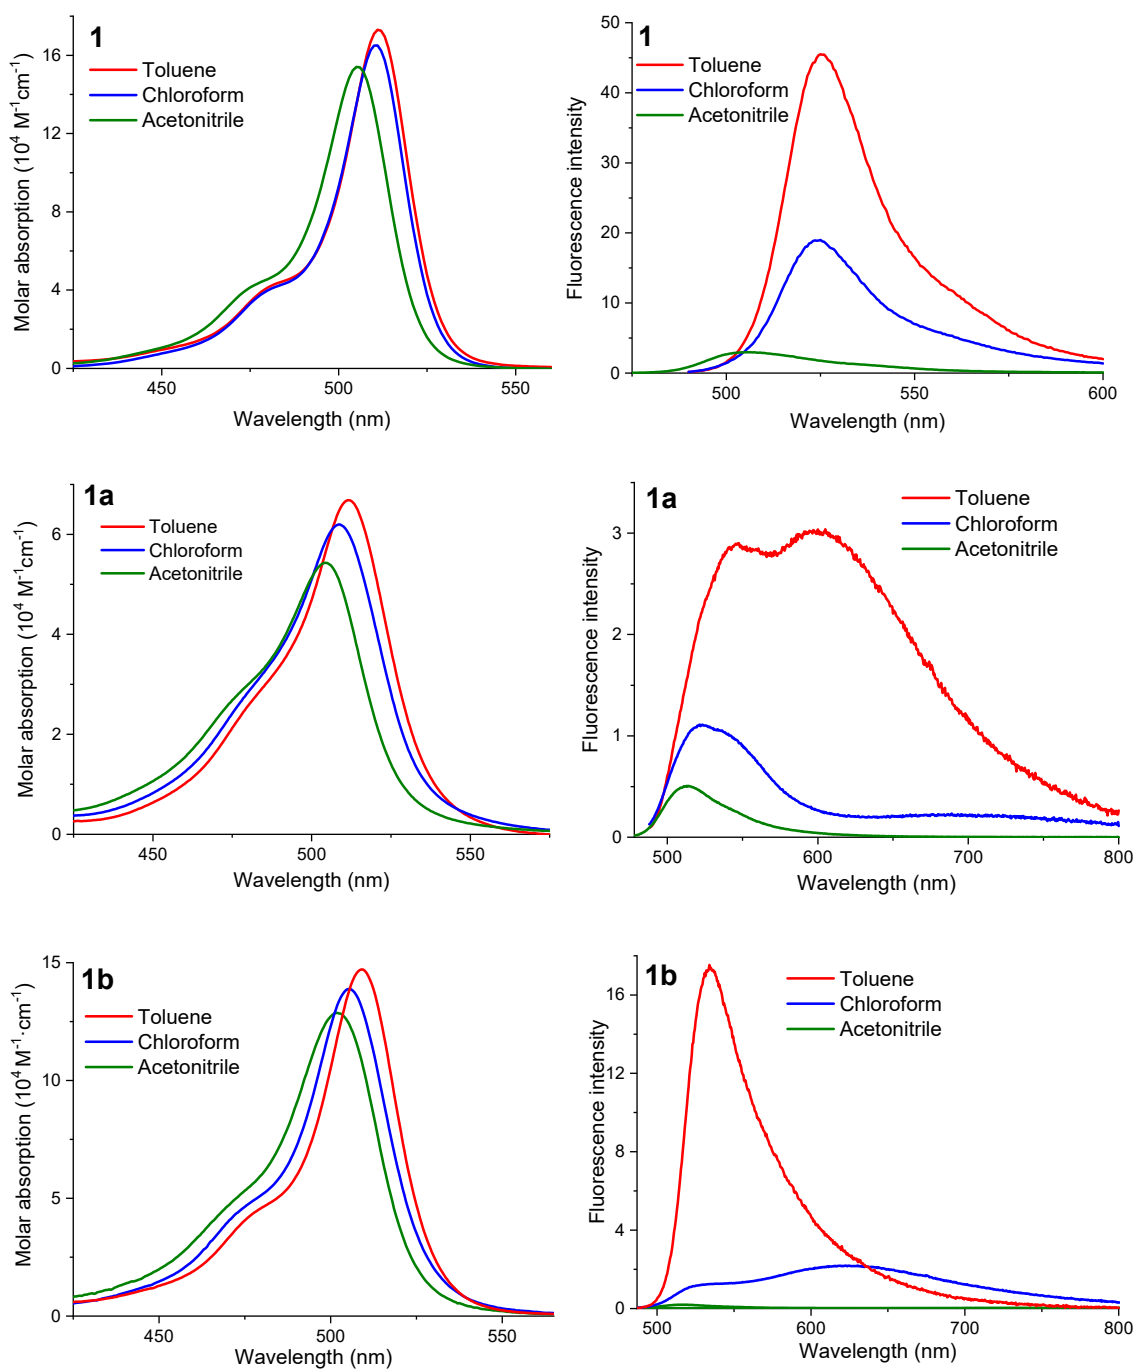

**Figure S1.** Absorption and fluorescence (scaled by fluorescence quantum yield) spectra of the 2-8' dimers in diluted solutions of different solvents.

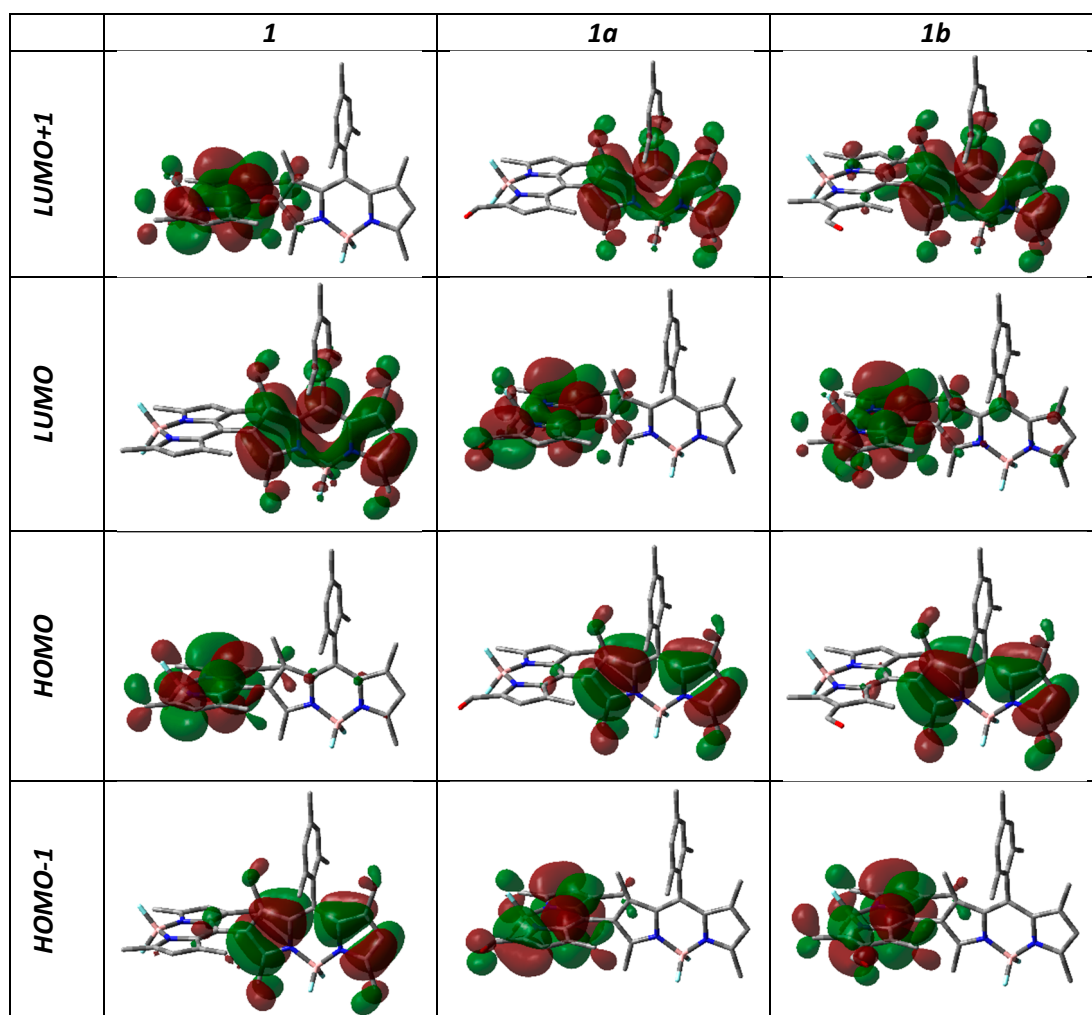

**Figure S2.** Contour maps of the main molecular orbital involved in the absorption transition of the 2-8' dimers attained from their ground state optimized geometries (CAM-B3LYP/6-311g\*) in chloroform (PCM).

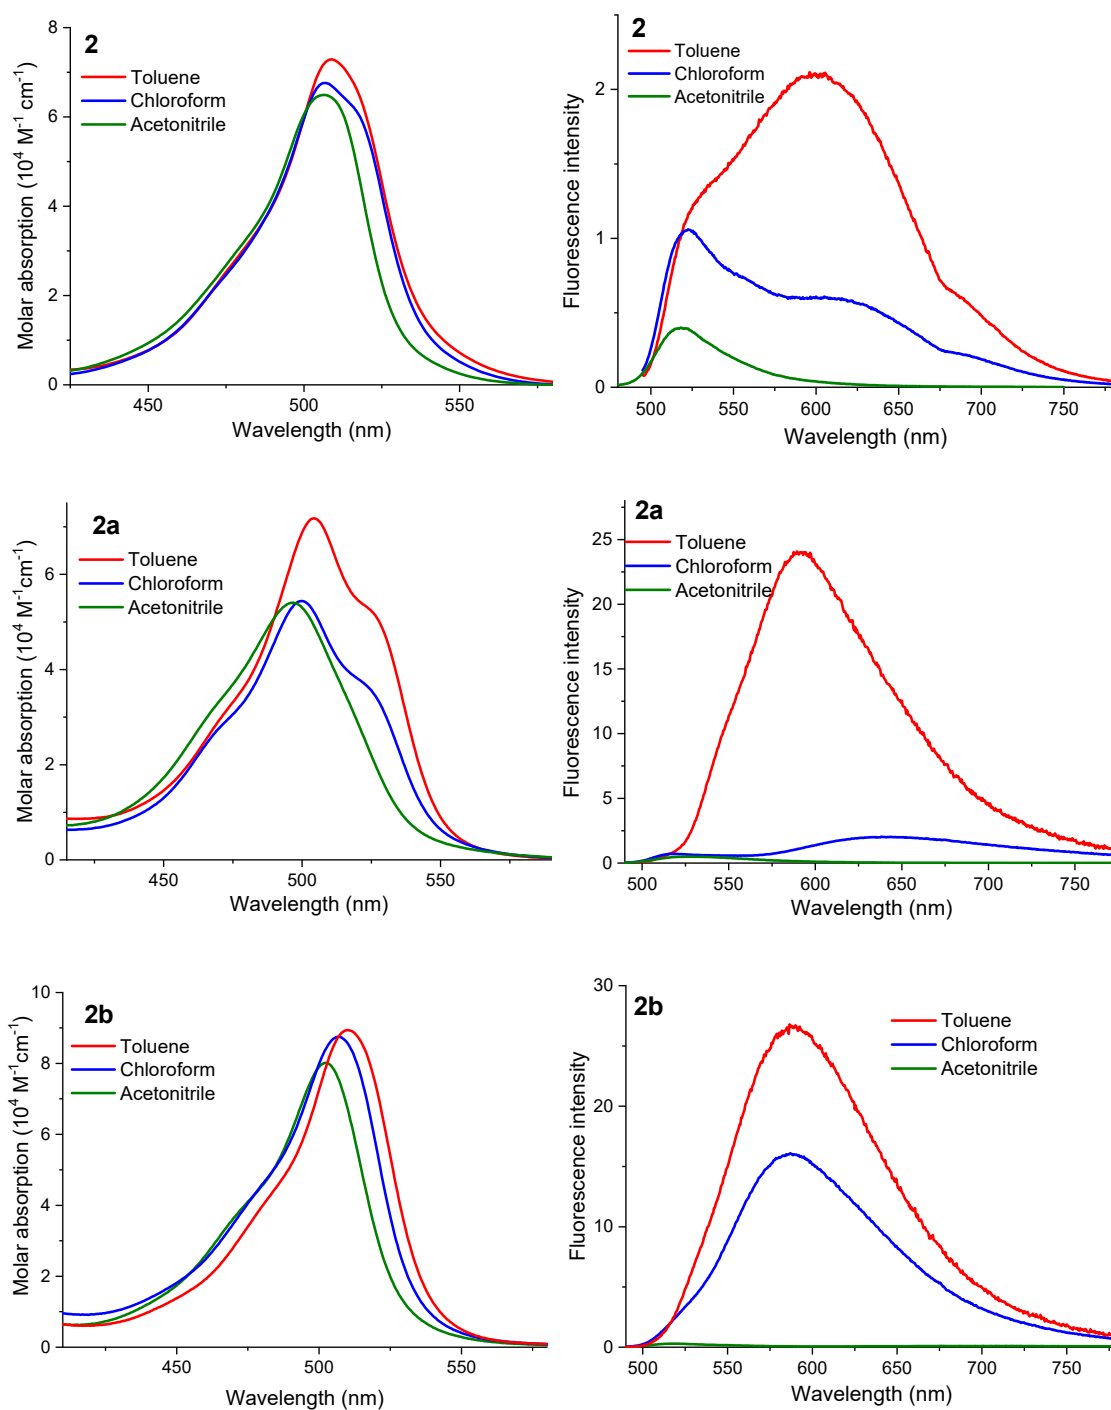

**Figure S3.** Absorption and fluorescence (scaled by fluorescence quantum yield) spectra of the 3-8' dimers in diluted solutions of different solvents.

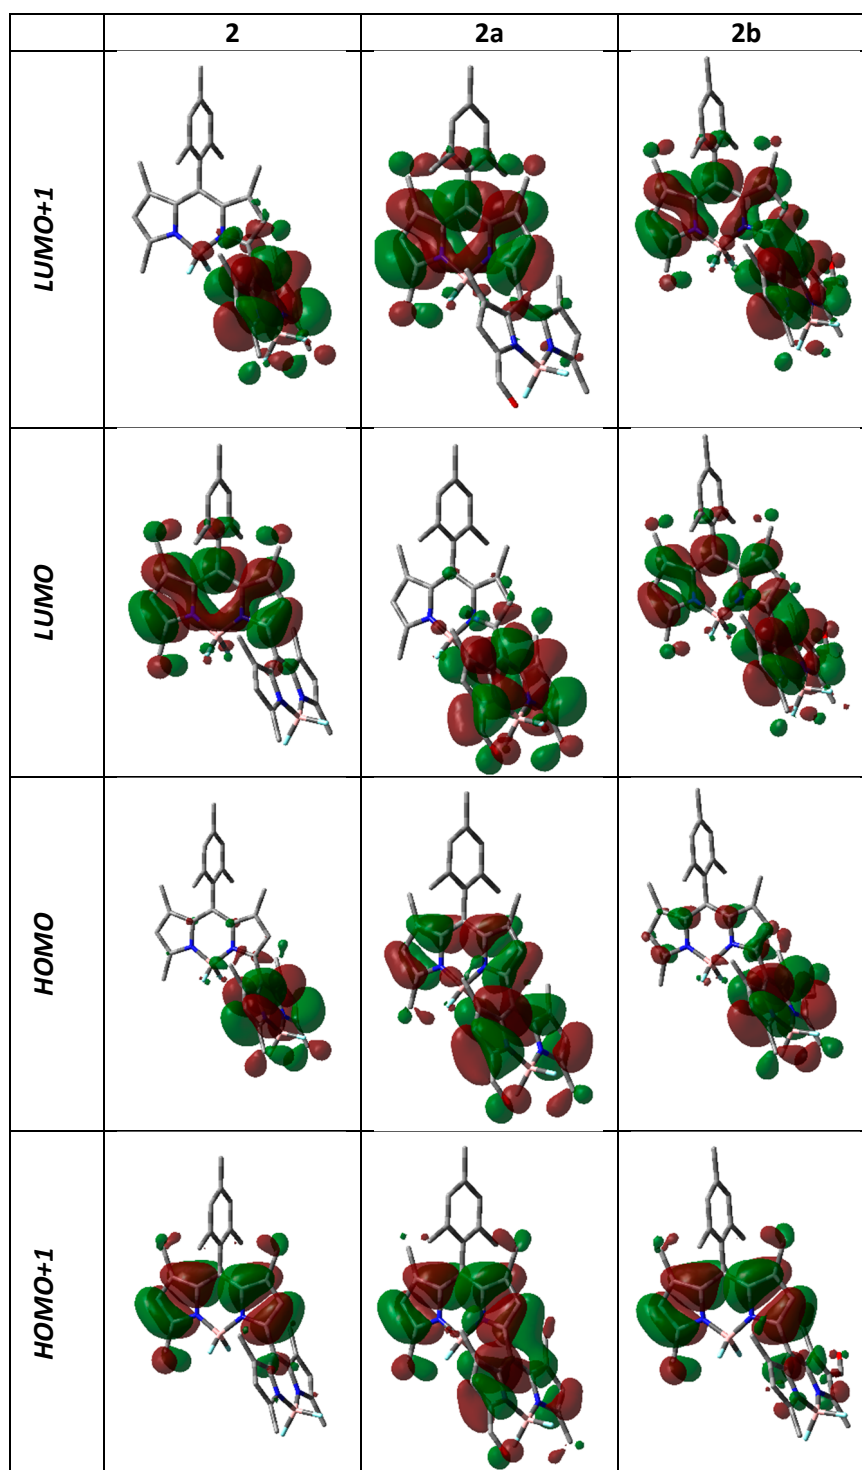

**Figure S4.** Contour maps of the main molecular orbital involved in the absorption transition of the 3-8' dimers attained from their ground state optimized geometries (CAM-B3LYP/6-311g\*) in chloroform (PCM).

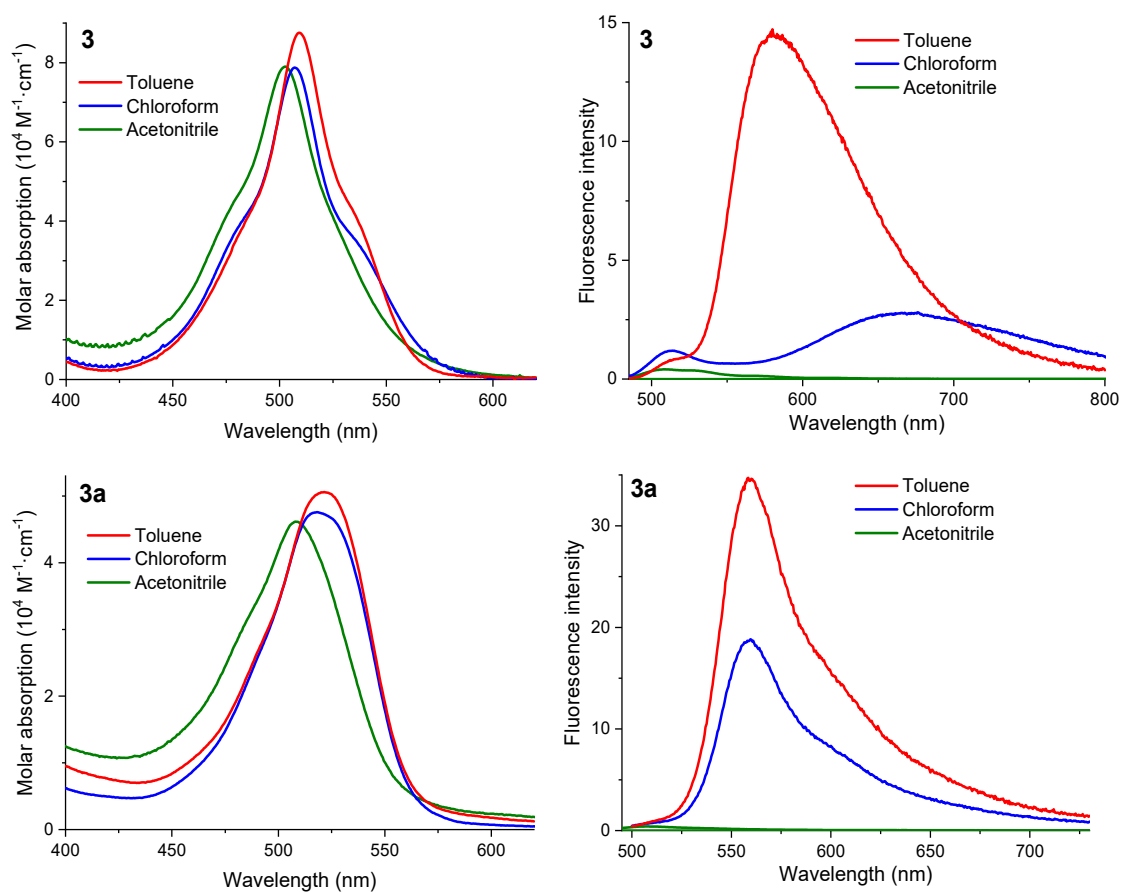

**Figure S5.** Absorption and fluorescence (scaled by fluorescence quantum yield) spectra of dimer **3** and its 3-formylated derivative **3a** in diluted solutions of different solvents.

|        | 3 | 3a |
|--------|---|----|
| LUMO+1 |   |    |
| LUMO   |   |    |
| HOMO   |   |    |
| HOMO-1 |   |    |

**Figure S6.** Contour maps of the main molecular orbital involved in the absorption transition of the less constrained 2-8' dimers attained from their ground state optimized geometries (CAM-B3LYP/6-311g\*) in chloroform (PCM).



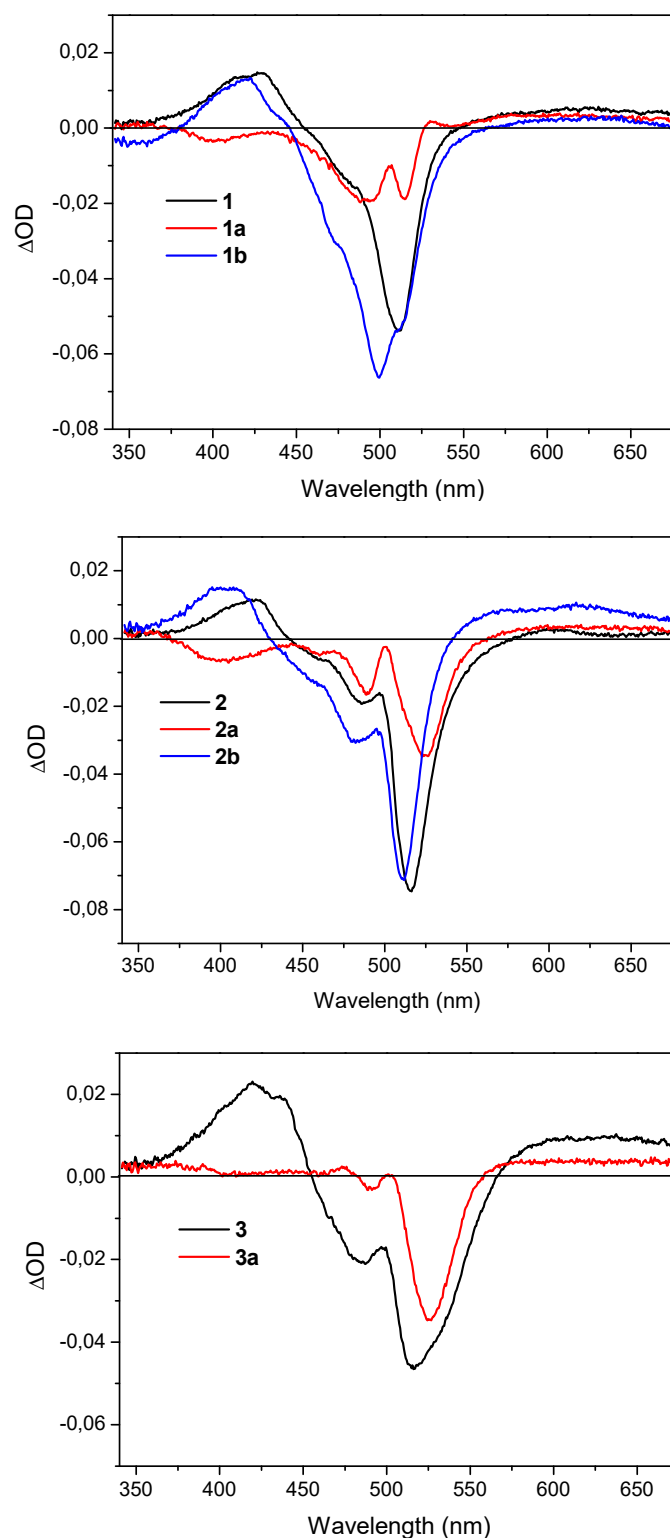

**Figure S7.** Transient absorption spectra of the dimers ( $10^{-5}$  M) in chloroform solutions after purging them with nitrogen during 15 minutes.

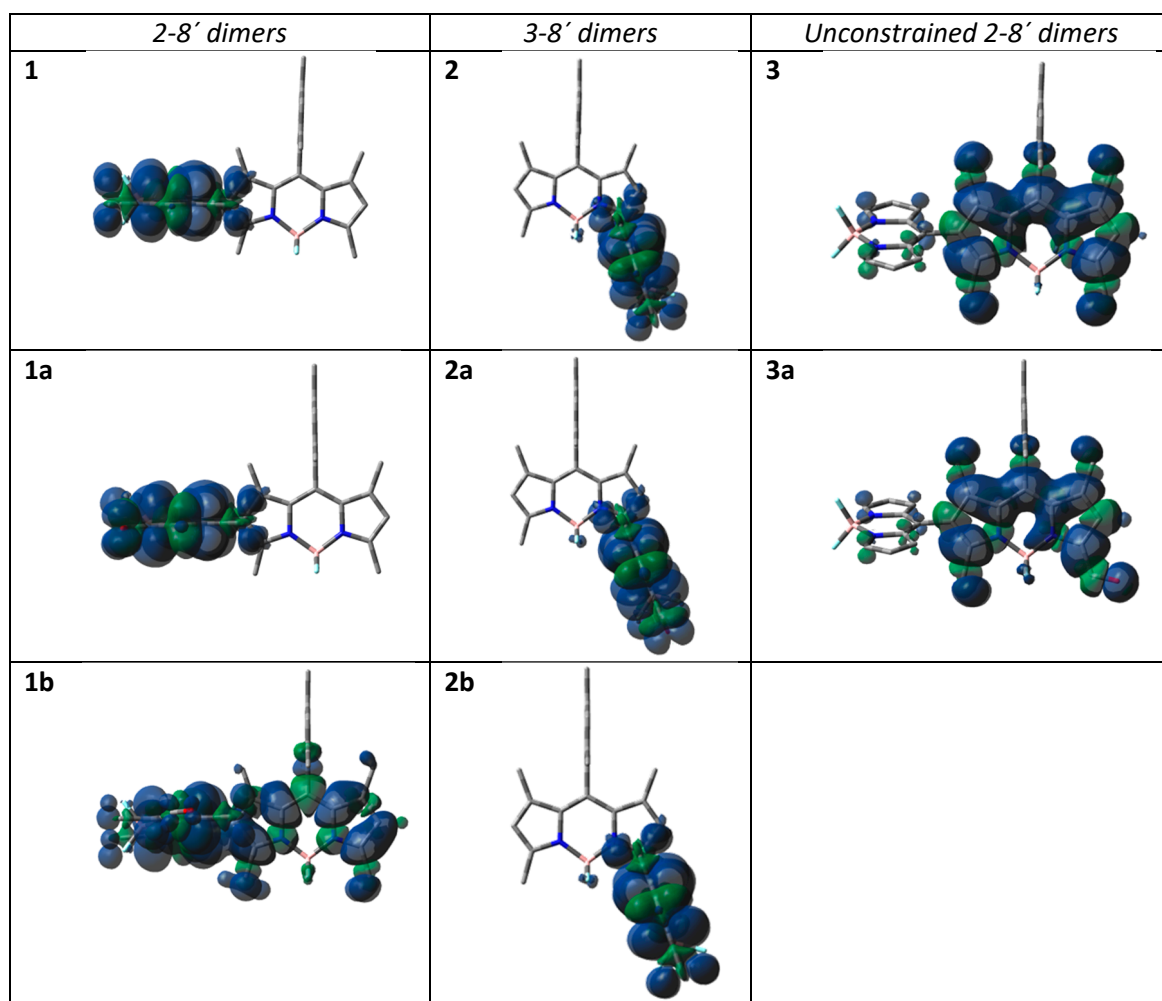

**Figure S8.** Isosurfaces of spin-density of the optimized  $T_1$  state geometry (CAM-B3LYP/6-311g\*) for all the tested dimers in chloroform (PCM).
